# Supplementary material for: Physical Activity Pattern Characterized by Domains and Dimensions of the Roma Population in Comparison with That of the General Population in Northeast Hungary
Source: MDPI journal article supplement (doi:10.3390/ijerph19063545), 2022-03-16
Supplement: s1 [file s1]

## Supplements

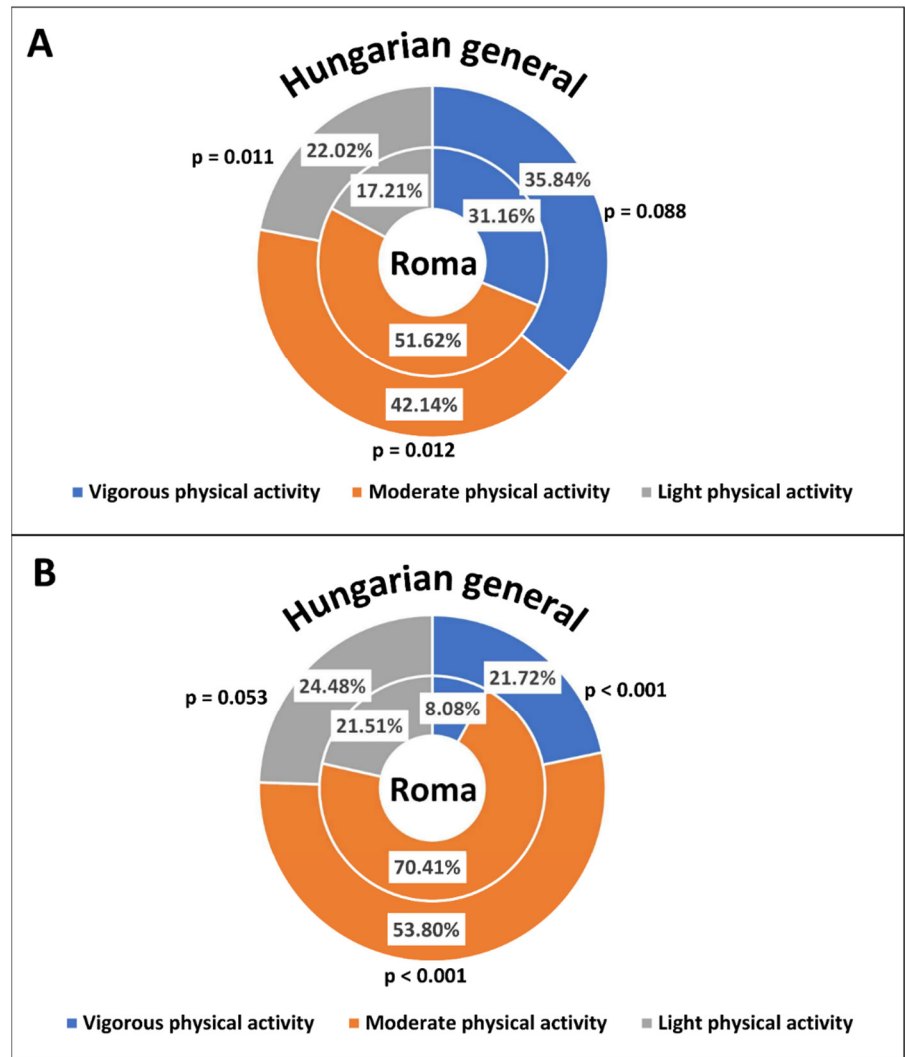

**Figure S1.** Representation of intensity categories (vigorous, moderate, and light) of physical activity in the study populations among men (A) and women (B).

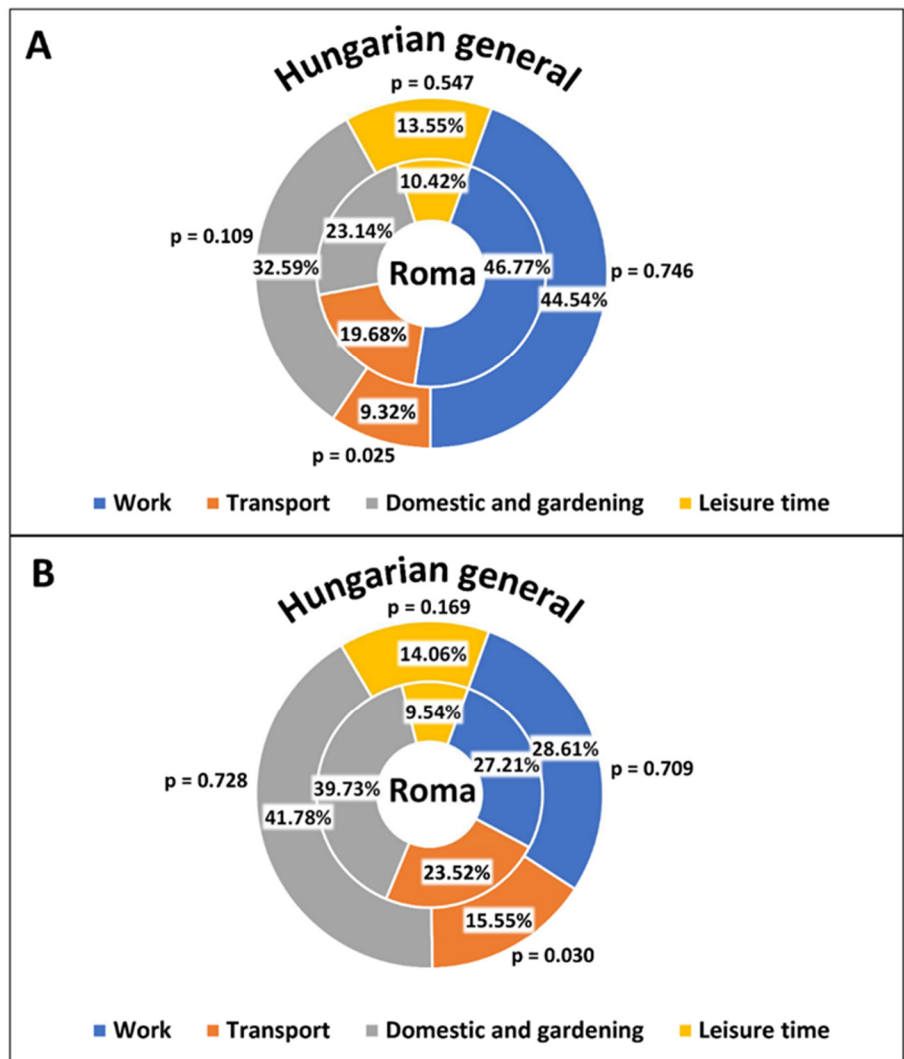

**Figure S2.** Representation of different domains (work, transport, domestic and garden, and leisure-time) of physical activity in the study populations among men (A) and women (B).
